# Supplementary material for: Association of α/β-Hydrolase D16B with Bovine Conception Rate and Sperm Plasma Membrane Lipid Composition
Source: Int J Mol Sci. 2020 Jan 17;21(2):627. doi: 10.3390/ijms21020627 (PMC7014312; doi:10.3390/ijms21020627)
Supplement: Supplementary file 1 [file ijms-21-00627-s001.xlsx]

## Sheet: lipid species with p(BH)<0.05
lipid species	mean(wt)	mean(het)	sem(wt)	sem(het)	p-value	p(BH)
PC 14:0;0_14:0;0	3.2043	18.6362	0.36392	0.7302	1.78884e-14	2.57593e-12
PC 14:0;0_18:1;0	2.6151	6.2005	0.1357	0.24734	1.56069e-11	1.1237e-09
PC 14:0;0_16:0;0	14.2857	45.8438	0.93818	2.49351	6.70959e-10	2.88926e-08
PC 14:0;0_18:0;0	2.4191	8.3636	0.19812	0.48277	8.02572e-10	2.88926e-08
PC 12:0;0_16:0;0	1.0866	8.8685	0.14142	0.64369	4.16606e-09	1.19983e-07
PC 16:0;0_18:0;0	6.3158	20.2908	0.95314	1.15313	1.28935e-08	2.32082e-07
Cer 34:1;3	0.26392	0.806798	0.0207482	0.0465354	1.28935e-08	2.32082e-07
LPC 22:6;0	2.08	5.44	0.18	0.42	1.28935e-08	2.32082e-07
Cer 32:1;2	3.18392	7.81016	0.359797	0.295989	5.15738e-08	7.42663e-07
DAG 14:0;0_16:1;0	4.53788	1.8757	0.310444	0.175982	5.15738e-08	7.42663e-07
PE 16:0;0_22:5;0	5.77653	10.2302	0.416323	0.45462	7.2835e-08	9.53477e-07
TAG 50:1;0	3.02396	8.01052	0.394757	0.476382	9.02542e-08	1.08305e-06
DAG 14:0;0_18:1;0	37.9945	17.0518	2.28535	0.752669	1.13548e-07	1.25776e-06
PC 16:0;0_22:5;0	6.6986	16.5777	1.04634	0.94131	1.23721e-07	1.27256e-06
PC 18:0;0_22:5;0	2.9809	6.8838	0.40329	0.39057	3.86804e-07	2.78499e-06
DAG 12:0;0_18:1;0	0.682323	0.283164	0.0481278	0.0238537	3.0738e-07	2.78499e-06
DAG 14:0;0_18:2;0	4.3977	7.19556	0.244889	0.522812	3.86804e-07	2.78499e-06
DAG 16:0;0_16:0;0	45.992	22.5298	5.18993	1.17443	3.86804e-07	2.78499e-06
PC O-16:1;0/20:4;0	2.10789	4.93153	0.248439	0.343824	3.18821e-07	2.78499e-06
PC O-18:2;0/22:6;0	7.88988	14.5063	0.454829	0.829273	3.86804e-07	2.78499e-06
PC 14:0;0_22:6;0	11.4981	19.8122	0.6422	0.79371	5.80205e-07	3.79771e-06
PE 18:0;0_22:5;0	2.42187	5.02318	0.212654	0.236911	5.80205e-07	3.79771e-06
Cer 36:1;2	2.533	4.58221	0.189799	0.245297	8.63861e-07	5.14038e-06
PE 18:2;0_18:2;0	1.05283	2.73993	0.0647345	0.213573	9.26321e-07	5.14038e-06
PE O-18:2;0/20:3;0	0.183075	0.591001	0.022523	0.0527219	9.28125e-07	5.14038e-06
LPC O-16:1;0	6	1.43	1.06	0.15	8.63861e-07	5.14038e-06
PC 16:0;0_20:2;0	3.0104	4.6248	0.18149	0.18652	1.0614e-06	5.66081e-06
Cer 38:1;2	1.11186	1.70519	0.0611642	0.0766117	1.58977e-06	8.17593e-06
PC O-17:1;0/22:6;0	20.1136	34.7847	1.61816	1.75928	1.79219e-06	8.89915e-06
DAG 16:0;0_18:1;0	40.3436	16.4515	3.19938	0.803524	2.14772e-06	1.0309e-05
PC 18:0;0_20:4;0	1.9148	3.8746	0.22602	0.23095	2.51422e-06	1.1314e-05
PC O-18:1;0/22:6;0	7.49356	14.3597	0.462369	0.971476	2.51422e-06	1.1314e-05
PC 16:0;0_18:1;0	33.7168	49.0183	1.95501	1.88597	4.93539e-06	2.03056e-05
TAG 52:2;0	0.863278	3.41445	0.203777	0.306345	4.80926e-06	2.03056e-05
PE 17:0;0_20:4;0	2.04813	3.65588	0.164065	0.158759	4.80926e-06	2.03056e-05
PC 16:0;0_18:2;0	3.2124	7.636	0.39979	0.63279	6.54987e-06	2.61995e-05
PC 16:0;0_20:4;0	11.4668	17.8311	0.8303	0.84125	9.70489e-06	3.77704e-05
PC O-18:2;0/16:0;0	0.244351	0.600117	0.0289298	0.0654918	1.17717e-05	4.46086e-05
PC O-17:0;0/22:6;0	4.577	8.41856	0.538143	0.366306	1.55495e-05	5.59782e-05
PA 16:0;0_18:0;0	59.0081	19.0377	6.39058	2.47187	1.55431e-05	5.59782e-05
PC 18:0;0_22:6;0	18.4661	27.9327	1.21016	1.3902	1.91132e-05	6.71294e-05
PC O-16:1;0/22:5;0	303.869	508.633	28.7019	27.9895	2.06653e-05	7.08525e-05
SM 42:1;2	3.92025	2.19657	0.280541	0.0904506	2.65476e-05	8.49524e-05
DAG 14:0;0_18:0;0	19.0747	10.0145	1.50922	0.558413	2.54655e-05	8.49524e-05
PC O-17:1;0/20:4;0	1.09206	4.12517	0.247218	0.504633	2.61698e-05	8.49524e-05
Cer 44:1;2	0.434716	0.819498	0.0510814	0.0602458	3.94113e-05	0.000123374
PC O-16:1;0/22:4;0	17.7457	31.805	2.33276	1.81477	5.3897e-05	0.000165131
DAG 14:0;0_20:1;0	0.32022	0.092356	0.040366	0.0141611	5.61897e-05	0.000168569
PC 18:0;0_18:1;0	1.4962	3.0216	0.21713	0.27525	0.000112534	0.000317743
PC O-16:1;0/16:0;0	2.44074	4.23851	0.302514	0.27711	0.000112534	0.000317743
PC O-16:1;0/22:6;0	2020.74	2730.27	101.539	145.746	0.000112534	0.000317743
SM 40:1;2	5.85552	3.39442	0.475129	0.155088	0.000129532	0.000351936
DAG 14:0;0_20:2;0	0.685742	0.462695	0.0422517	0.0223756	0.000128513	0.000351936
SM 42:2;2	6.62022	3.95856	0.515511	0.175778	0.000134244	0.000357985
PC O-16:1;0/24:5;0	1.80499	3.21784	0.120028	0.272713	0.000137697	0.000360516
PC 16:0;0_16:1;0	1.0123	1.501	0.06083	0.09444	0.000163127	0.000419469
PE 20:4;0_24:4;0	10.1604	14.3482	0.797182	0.564937	0.000194258	0.000490758
PI 18:0;0_18:0;0	41.7562	24.6847	3.4692	1.14282	0.000217892	0.000531803
PG 16:0;0_16:0;0	0.296671	0.586297	0.0524917	0.0455102	0.000215063	0.000531803
SM 36:1;2	3.80712	2.44336	0.28523	0.091895	0.000288186	0.000691647
PC 16:0;0_20:3;0	5.385	7.8248	0.50898	0.34207	0.000445069	0.00105065
HexCer 34:1;3	0.35	0.58	0.05	0.05	0.000478141	0.00111052
PC O-16:0;0/22:5;0	31.3058	53.2563	5.10347	3.01188	0.000577781	0.00132064
PC 14:0;0_20:4;0	4.5315	6.2654	0.35269	0.27957	0.000622885	0.00140149
SM 38:1;2	2.08294	1.51738	0.129865	0.0728721	0.000720484	0.00159615
Cer 42:1;2	0.900545	1.21092	0.058592	0.0575148	0.000755001	0.00164728
PE 14:0;0_20:4;0	1.249	1.71148	0.104314	0.0948865	0.00083409	0.00179267
PC O-17:1;0/22:5;0	0.445201	0.943982	0.121663	0.117435	0.000996702	0.00205036
PE O-16:1;0/24:5;0	0.904255	0.59935	0.0696737	0.0849856	0.000996702	0.00205036
PE O-18:1;0/22:5;0	1.50163	2.27886	0.211967	0.160157	0.000996702	0.00205036
PE O-17:0;0/22:6;0	0.413047	0.904389	0.0900203	0.0994942	0.00103193	0.00209294
DAG 14:0;0_22:6;0	5.43097	3.68571	0.417151	0.172196	0.00106912	0.00213825
PE 20:1;0_20:4;0	2.8549	1.59924	0.30541	0.0913857	0.00111501	0.00219947
PE 20:4;0_22:3;0	1.17055	1.58385	0.0935154	0.0792607	0.00219801	0.0042772
PC 18:0;0_18:2;0	0.6024	0.8706	0.12757	0.10514	0.00270187	0.0051876
PC 18:1;0_18:1;0	1.6308	2.4258	0.22494	0.13448	0.00315538	0.00590096
DAG 14:0;0_16:0;0	200.254	141.717	15.719	7.63824	0.00314968	0.00590096
PA 14:0;0_14:0;0	39.9506	65.4407	5.45129	6.67998	0.00625541	0.0115485
PE 18:1;0_20:4;0	7.73397	4.85501	0.902465	0.191964	0.00690061	0.0125783
DAG 16:0;0_20:2;0	1.66012	1.12263	0.116789	0.150454	0.00754355	0.0134107
PE 16:0;0_18:1;0	1.77139	2.21763	0.161315	0.106143	0.00754355	0.0134107
PC O-16:0;0/18:2;0	0.150625	0.25836	0.0255835	0.0277664	0.00864181	0.0151759
PC 18:1;0_20:4;0	0.8785	1.5884	0.18897	0.16727	0.00887491	0.0153894
PE 18:0;0_20:4;0	73.6736	90.6943	4.94218	3.50896	0.00897712	0.0153894
PC 17:0;0_22:6;0	2.2416	5.8287	0.16202	1.18985	0.00947982	0.0160599
PE O-16:0;0/22:6;0	14.8337	10.8458	1.30501	0.694411	0.00987482	0.0165346
PE O-17:1;0/22:6;0	5.32742	6.23164	0.609779	0.271773	0.011256	0.0186306
PE 20:4;0_24:3;0	1.84861	2.41535	0.0964653	0.189006	0.0124619	0.0203921
PE 18:0;0_22:6;0	4.0788	6.1622	0.299417	0.71045	0.014197	0.0229704
PC 18:1;0_20:3;0	0.8537	1.3585	0.12629	0.12639	0.0145192	0.0232307
Cer 40:1;2	2.19378	2.54619	0.0865476	0.106789	0.0160105	0.0250599
DAG 16:0;0_18:0;0	35.0567	26.8605	2.75723	1.60908	0.0158774	0.0250599
Cer 34:0;2	0.38166	0.455887	0.0453316	0.0212123	0.0185537	0.0278306
DAG 16:0;0_18:2;0	2.01527	2.92922	0.178977	0.251416	0.0185537	0.0278306
PE 18:1;0_18:1;0	0.295161	0.411075	0.0362241	0.0384391	0.0185537	0.0278306
PE 18:1;0_18:2;0	0.226912	0.30294	0.0285402	0.023378	0.0185537	0.0278306
PG 16:0;0_18:1;0	4.24314	2.62215	0.554215	0.373424	0.0219801	0.0326303
SM 34:1;2	57.0093	46.1407	4.12268	1.82156	0.0260241	0.0382396
PE 16:0;0_22:6;0	9.21967	11.093	0.728089	0.508819	0.0294965	0.042904
